# Supplementary material for: Genomic Aberrations in Circulating Tumor DNAs from Palbociclib-Treated Metastatic Breast Cancer Patients Reveal a Novel Resistance Mechanism
Source: MDPI journal article supplement (doi:10.3390/cancers14122872), 2022-06-10
Supplement: s1 [file s1]

**Table S1.** The panel of 91 breast cancer-related genes.

| Gene          |               |              |               |               |               |               |              |
|---------------|---------------|--------------|---------------|---------------|---------------|---------------|--------------|
| <i>AKT1</i>   | <i>CCND1</i>  | <i>ESR1</i>  | <i>HNF1A</i>  | <i>MAP2K4</i> | <i>NF2</i>    | <i>PTPN11</i> | <i>TBX3</i>  |
| <i>ALK</i>    | <i>CCND2</i>  | <i>EZH2</i>  | <i>HRAS</i>   | <i>MAP3K1</i> | <i>NFE2L2</i> | <i>RAF1</i>   | <i>TERT</i>  |
| <i>APC</i>    | <i>CCND3</i>  | <i>FBXW7</i> | <i>IDH1</i>   | <i>MAPK1</i>  | <i>NOTCH1</i> | <i>RB1</i>    | <i>TP53</i>  |
| <i>AR</i>     | <i>CCNE1</i>  | <i>FGFR1</i> | <i>IDH2</i>   | <i>MAPK3</i>  | <i>NPM1</i>   | <i>RET</i>    | <i>TSC1</i>  |
| <i>ARAF</i>   | <i>CDH1</i>   | <i>FGFR2</i> | <i>IGF1R</i>  | <i>MDM2</i>   | <i>NRAS</i>   | <i>RHEB</i>   | <i>TSC2</i>  |
| <i>ARID1A</i> | <i>CDK4</i>   | <i>FGFR3</i> | <i>JAK2</i>   | <i>MET</i>    | <i>NTRK1</i>  | <i>RHOA</i>   | <i>VHL</i>   |
| <i>ARID1B</i> | <i>CDK6</i>   | <i>FOXA1</i> | <i>JAK3</i>   | <i>MLH1</i>   | <i>NTRK3</i>  | <i>RIT1</i>   | <i>ZNF21</i> |
| <i>ATM</i>    | <i>CDKN2A</i> | <i>GATA3</i> | <i>KIT</i>    | <i>MPL</i>    | <i>PDGFRA</i> | <i>ROS1</i>   |              |
| <i>BRAF</i>   | <i>CTNNB1</i> | <i>GNA11</i> | <i>KMT2C</i>  | <i>MTOR</i>   | <i>PIK3CA</i> | <i>SMAD4</i>  |              |
| <i>BRCA1</i>  | <i>DDR2</i>   | <i>GNAQ</i>  | <i>KRAS</i>   | <i>MYC</i>    | <i>PIK3R1</i> | <i>SMO</i>    |              |
| <i>BRCA2</i>  | <i>EGFR</i>   | <i>GNAS</i>  | <i>MAP2K1</i> | <i>NCOR1</i>  | <i>PTCH1</i>  | <i>SOS</i>    |              |
| <i>CBFB</i>   | <i>ERBB2</i>  | <i>GRB2</i>  | <i>MAP2K2</i> | <i>NF1</i>    | <i>PTEN</i>   | <i>STK11</i>  |              |

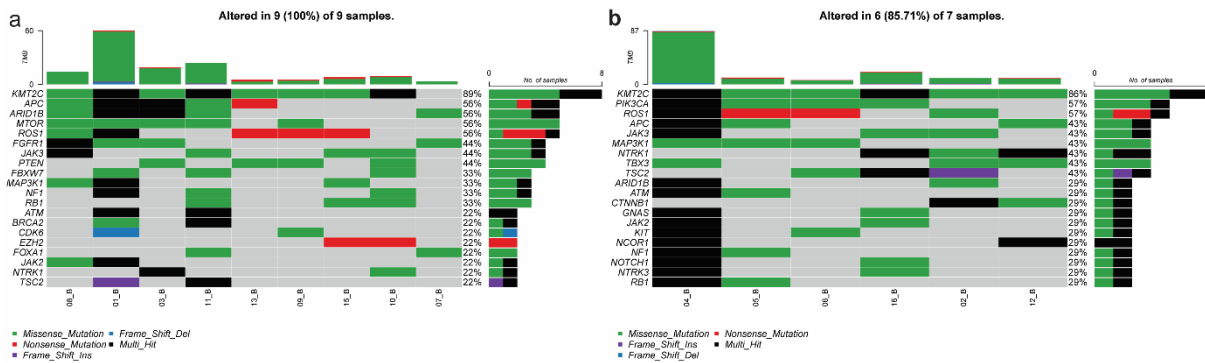

**Figure S1.** The top 20 most frequently mutated genes in blood samples collected at baseline for individual patients with IBC (a) or non-IBC (b). IBC: inflammatory breast cancer.

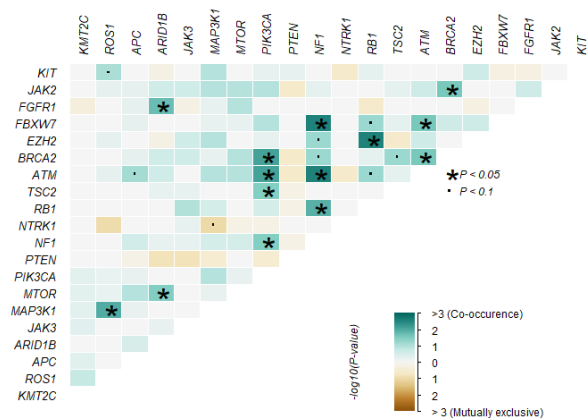

**Figure S2.** Co-occurrence and mutual exclusivity of mutated genes detected in baseline blood samples. Matrix depicting the degrees of co-occurrence (green scale) and mutual exclusivity (orange scale) of all possible pairwise combinations of any two mutated genes across a dataset of 20 analyzed genes.

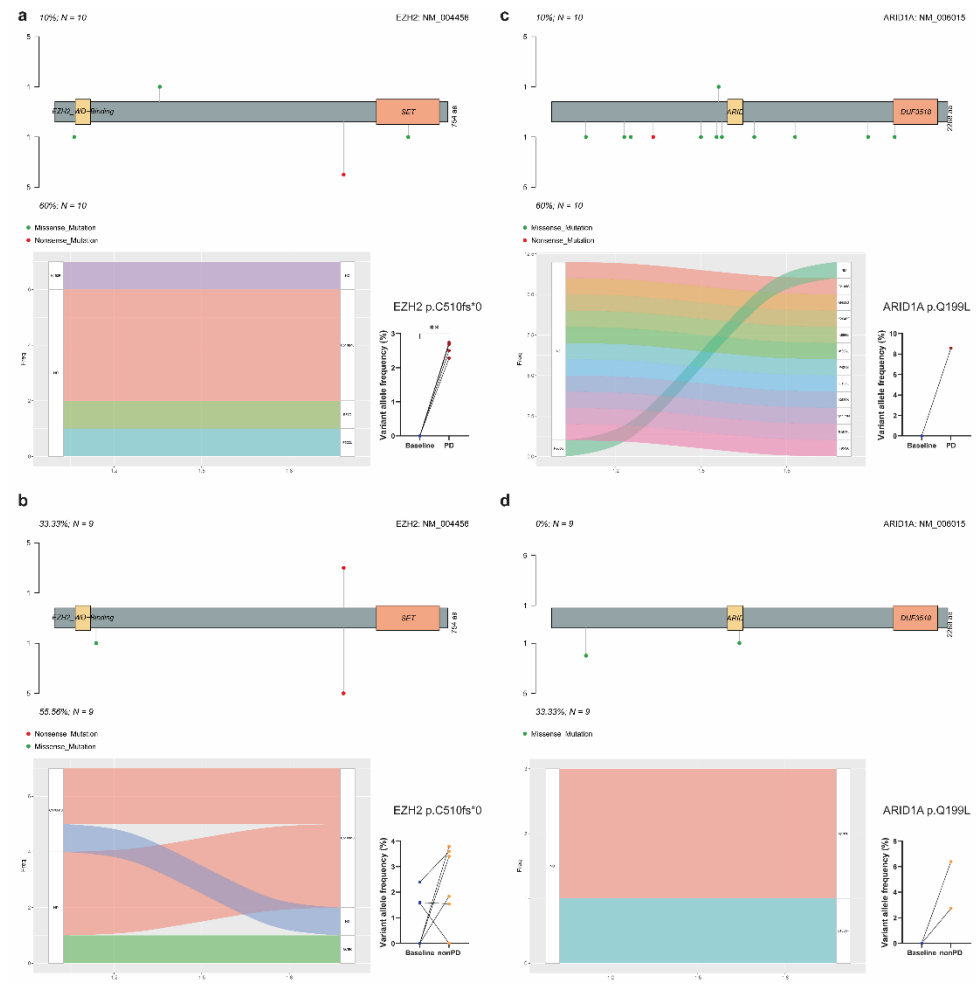

**Figure S3.** Changes in individual mutations in genes involved in epigenetic regulation and changes in variant allele frequency of a given mutation from baseline to follow-up as determined by analyzing paired samples. (a) and (b) show the changes in *EZH2* mutations in baseline-PD pairs or baseline-nonPD pairs. (c) and (d) show the changes in *ARID1A* mutations in baseline-PD pairs or baseline-nonPD pairs. PD: progressive disease; ND: not detected. \*\* represents  $P < 0.01$ .

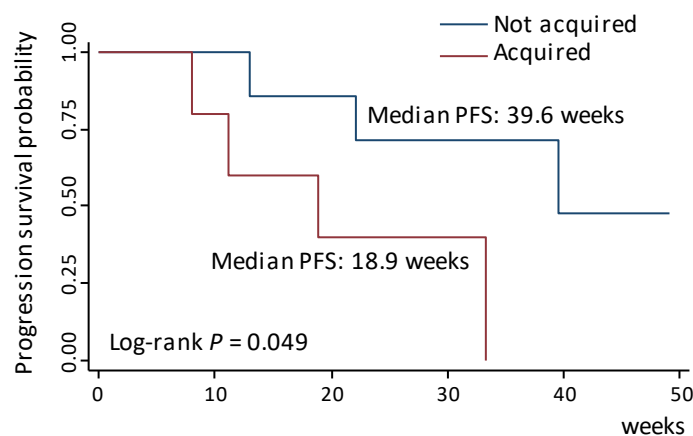

**Figure S4.** Kaplan-Meier curve showing survival difference between patients who acquired or did not acquire *CCNE1* mutations. PD status was determined by the first imaging test after treatment initiation. PD: progressive disease.

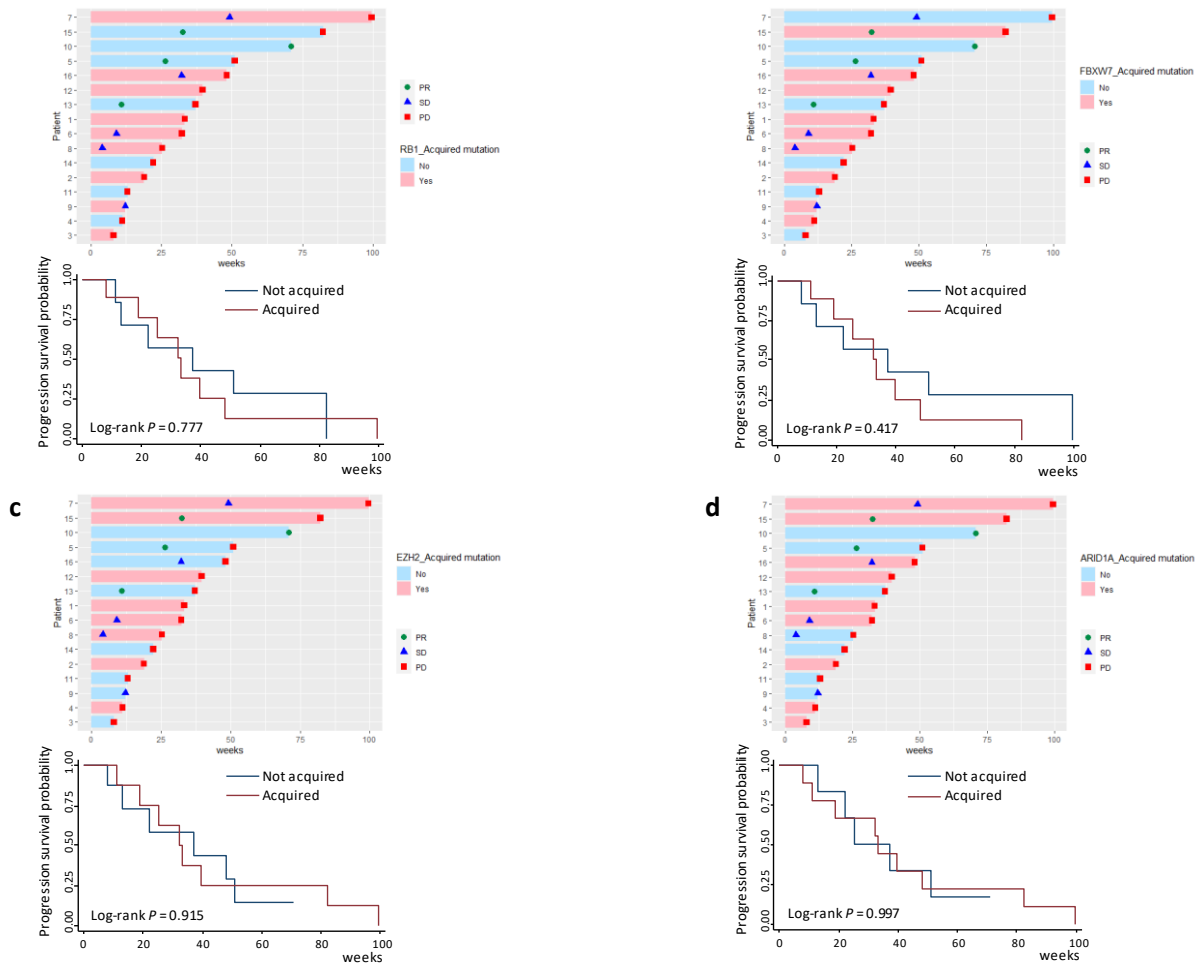

**Figure S5.** RECIST responses during follow-up for individual patients and survival difference between patients who acquired or did not acquire mutations in genes *RB1* (a), *FBXW7* (b), *EZH2* (c), and *ARID1A* (d). RECIST: the Response Evaluation Criteria in Solid Tumors; PD: progressive disease; PR: partial response; SD: stable disease.
